# Supplementary material for: Transcriptomics and Genomics Analysis Uncover the Differentially Expressed Chlorophyll and Carotenoid-Related Genes in Celery
Source: MDPI journal article supplement (doi:10.3390/ijms23168986), 2022-08-12
Supplement: s1 [file s1]

## Supplementary Figures S1–S4

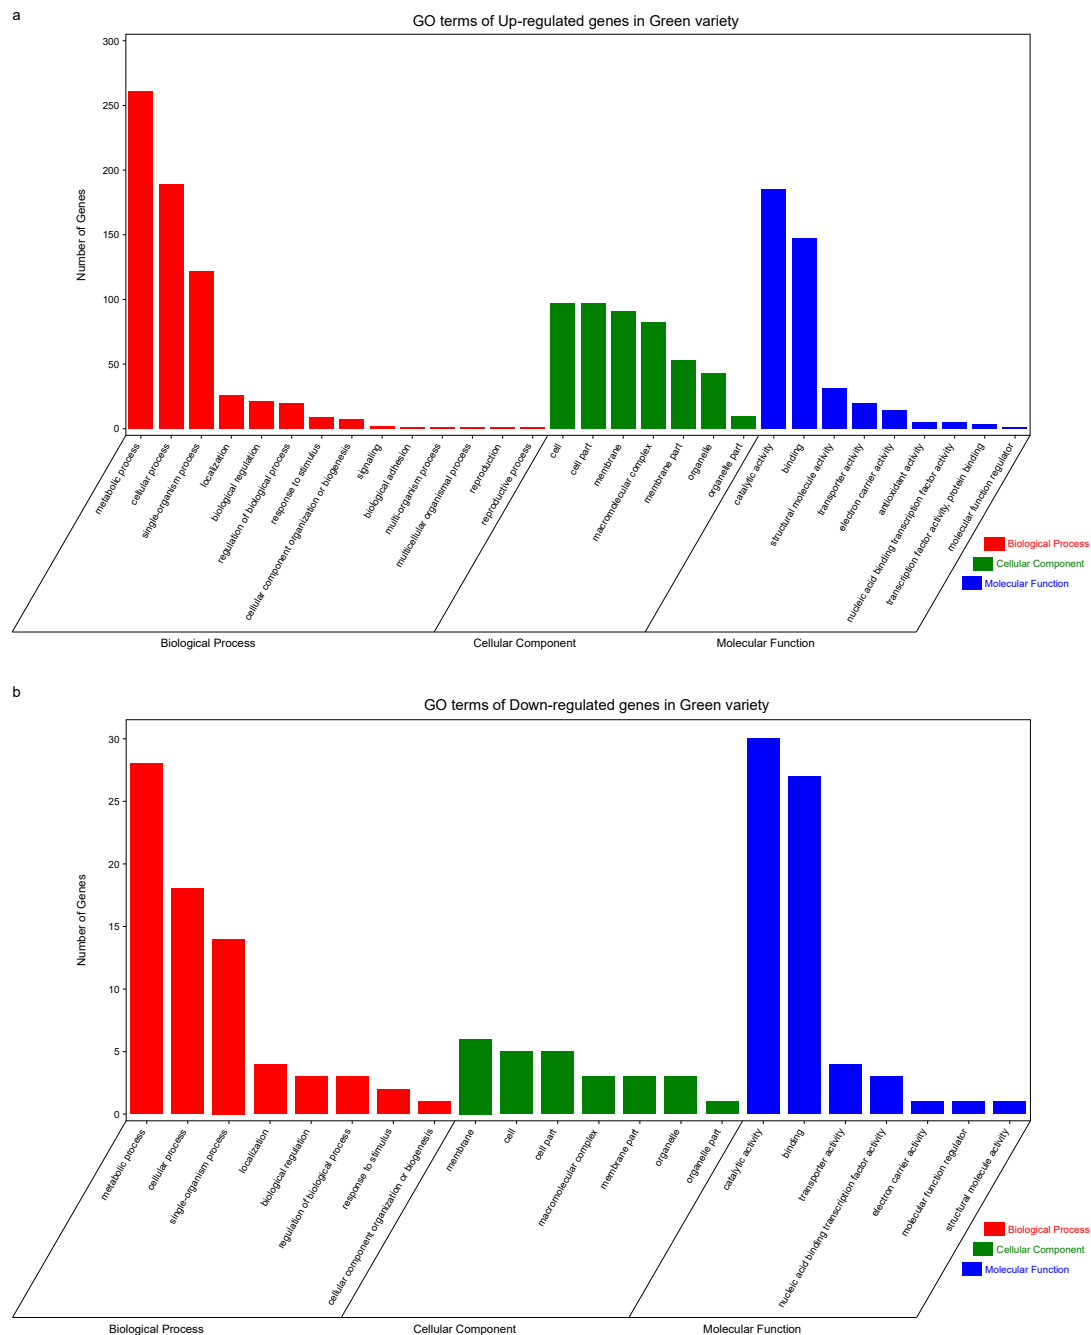

**Figure S1. The histogram of GO annotation for differentially expressed genes (DEGs) in green celery comparing with other two varieties. (a) GO terms for up-regulated genes in green celery. (b) GO terms for down-regulated genes in green celery.**





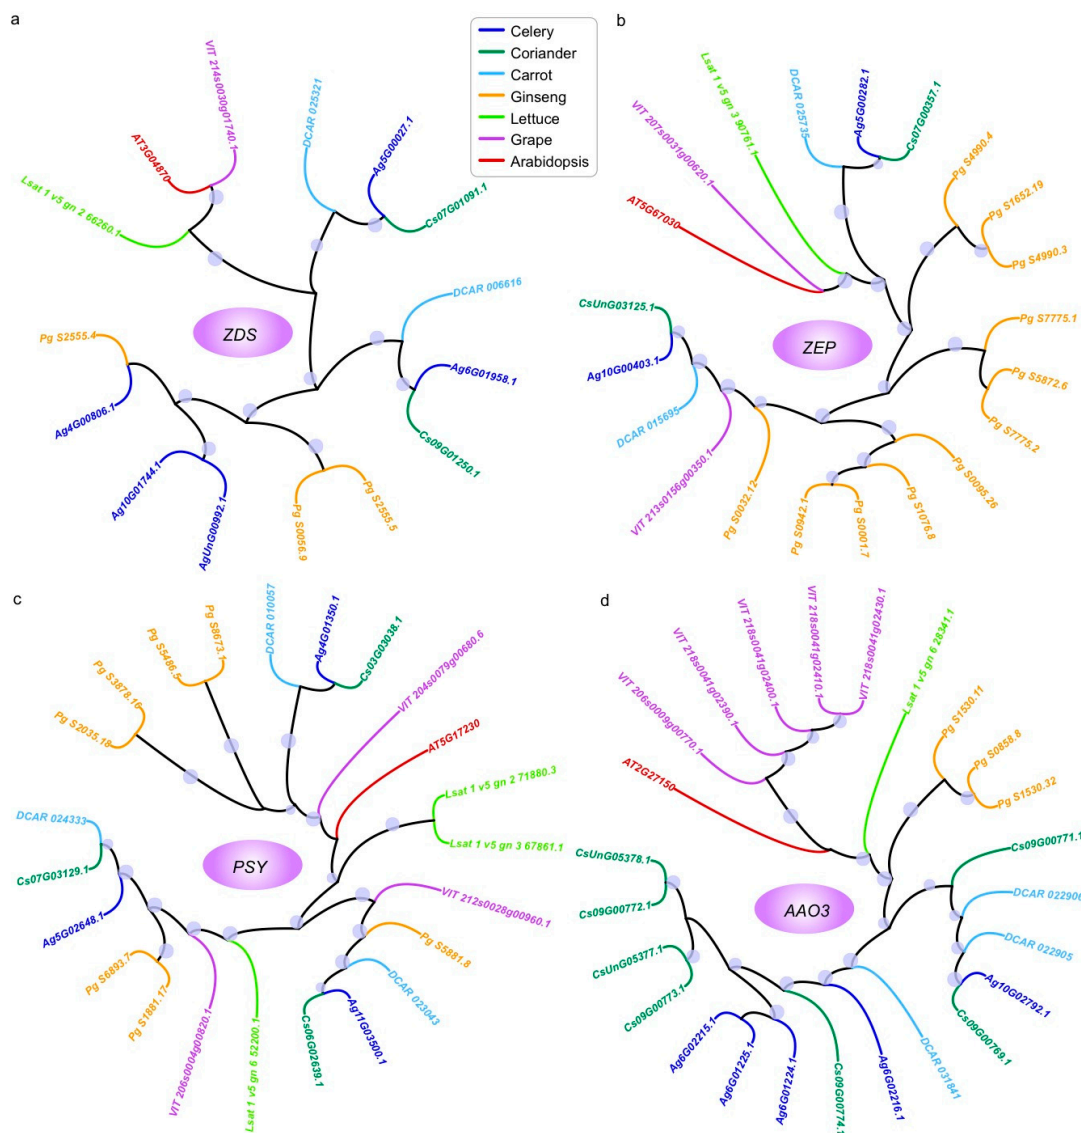

**Figure S4. The maximum-likelihood (ML) tree of carotenoids biosynthesis genes** were generated based on the amino acid sequences with 1,000 bootstrap repeats in seven species. The size of the circle on the branch represents the value of bootstrap with ranges from 40 to 100. (a) *ZDS* genes. (b) *ZEP* genes. (c) *PSY* genes. (d) *AAO3* genes.
